# Supplementary material for: Hydroxyl-containing non-viral lipidic gene vectors with macrocyclic polyamine headgroups
Source: Royal Society of Chemistry journal article supplement (doi:10.1039/c5ra09617k), 2015-01-01
Supplement: c5ra09617k1.pdf [file c5ra09617k1.pdf]

## Electronic Supplementary Information

# Hydroxyl-containing non-viral lipidic gene vectors with macrocyclic polyamine headgroups

Hai-Jiao Wang,<sup>a</sup> Xi He,<sup>a</sup> Yang Zhang,<sup>b</sup> Ji Zhang,<sup>\*a</sup> Yan-Hong Liu,<sup>a</sup> and Xiao-Qi Yu<sup>\*a</sup>

*<sup>a</sup>Key Laboratory of Green Chemistry and Technology (Ministry of Education), College of Chemistry, Sichuan University, Chengdu 610064, PR China*

*<sup>b</sup>College of Life Sciences, Sichuan University, Chengdu 610064, PR China*

\*Corresponding authors: xqyu@scu.edu.cn (X.-Q. Yu); jzhang@scu.edu.cn (J. Zhang). Fax: +86-28-85415886 (X.-Q. Yu)

**Table S1.** Particle size and zeta-potential of **6a** and **7a** against two weeks. The molar ratio of lipid/DOPE was 1 : 3.

| Liposome  | Particle size (nm) |             |             | Zeta-potential (mV) |            |            |
|-----------|--------------------|-------------|-------------|---------------------|------------|------------|
|           | Fresh liposome     | 7 days      | 14 days     | Fresh liposome      | 7 days     | 14 days    |
| <b>6a</b> | 139.9 ± 3.4        | 139.7 ± 1.0 | 140.3 ± 2.6 | 52.5 ± 2.8          | 54.3 ± 1.7 | 49.0 ± 1.7 |
| <b>7a</b> | 134.6 ± 0.6        | 135.9 ± 0.5 | 134.4 ± 0.6 | 50.8 ± 0.5          | 52.6 ± 0.4 | 49.0 ± 0.7 |

**Table S2.** Particle size of liposome and lipoplexe against serum. “N/P = ∞” means that the liposomes without DNA. The molar ratio of lipid/DOPE was 1 : 3.

| Liposome  | N/P | With out serum (nm) | Serum (nm)   |
|-----------|-----|---------------------|--------------|
| <b>6a</b> | ∞   | 139.9 ± 3.4         | 259.3 ± 15.0 |
|           | 6   | 163.8 ± 2.9         | 263.9 ± 9.8  |
| <b>6b</b> | ∞   | 139.9 ± 2.3         | 244.0 ± 1.9  |
|           | 6   | 185.7 ± 19.9        | 258.5 ± 6.5  |
| <b>6b</b> | ∞   | 128.8 ± 2.7         | 227.8 ± 11.1 |
|           | 6   | 165.5 ± 27.7        | 256.7 ± 23.5 |
| <b>6c</b> | ∞   | 120.5 ± 1.6         | 208.8 ± 19.6 |
|           | 6   | 122.6 ± 9.7         | 208 ± 18.0   |
| <b>7a</b> | ∞   | 134.6 ± 2.2         | 257.4 ± 15.8 |
|           | 6   | 155.5 ± 7.7         | 249.4 ± 11.0 |
| <b>7b</b> | ∞   | 142.8 ± 0.4         | 249.4 ± 8.2  |
|           | 6   | 168.8 ± 5.3         | 233.2 ± 14.7 |

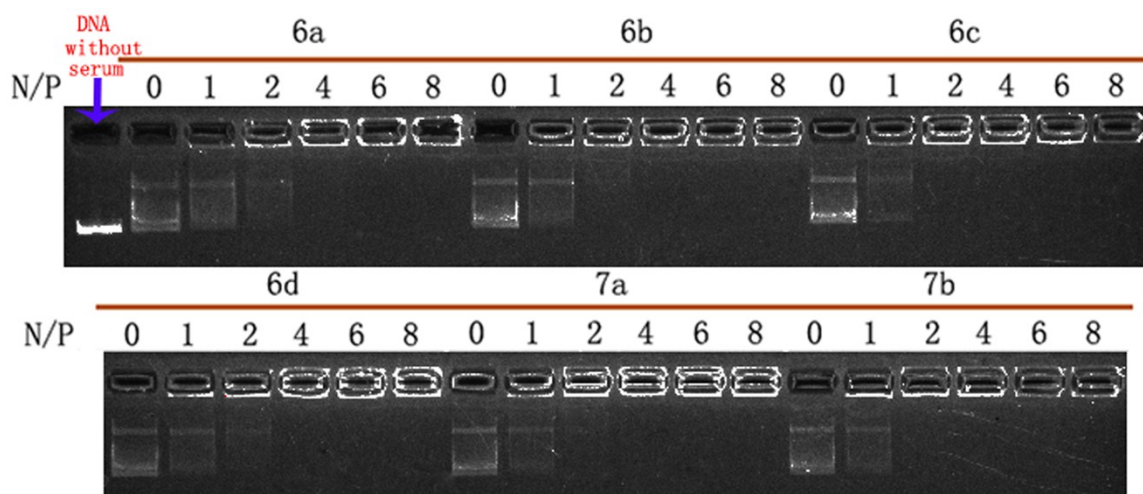

**Fig. S1.** Electrophoretic gel retardation assays of lipoplexes at different N/P ratios in the presence of 10% serum. The molar ratio of lipid/DOPE was 1 : 3.

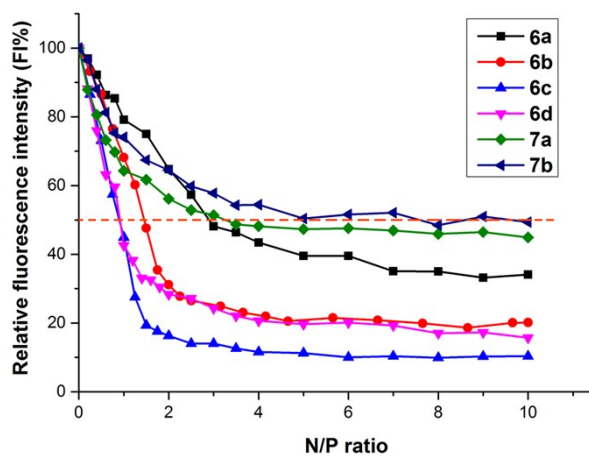

**Fig. S2.** Fluorescence quenching of EB by lipids 6 and 7/DOPE at various N/P ratios in 10 mM of HEPES buffer. The molar ratio of lipid/DOPE was 1 : 3.

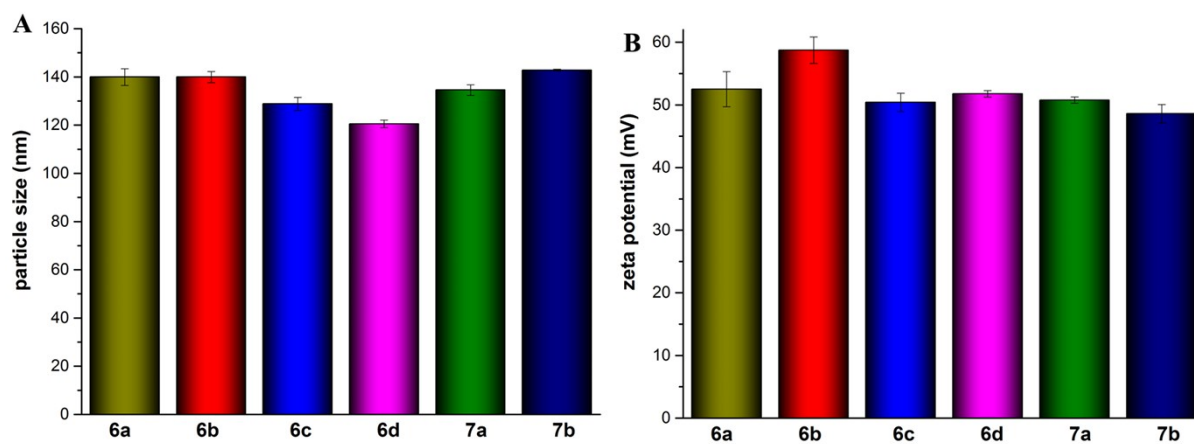

**Fig. S3.** Mean particle size (A) and Zeta-potential (B) of the liposomes without DNA (DLS at room temperature). The molar ratio of lipid/DOPE was 1 : 3.

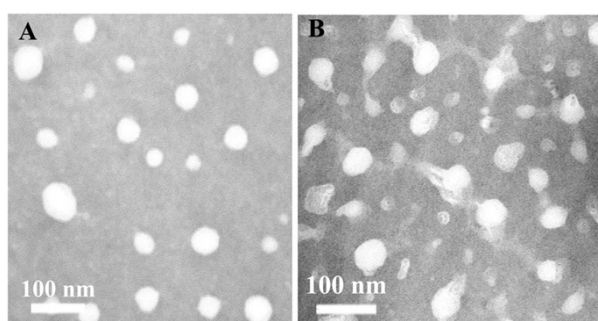

**Fig. S4.** TEM images of the liposomes formed from 6a (A) and 7a (B) in deionized water. The molar ratio of lipid/DOPE was 1 : 3.

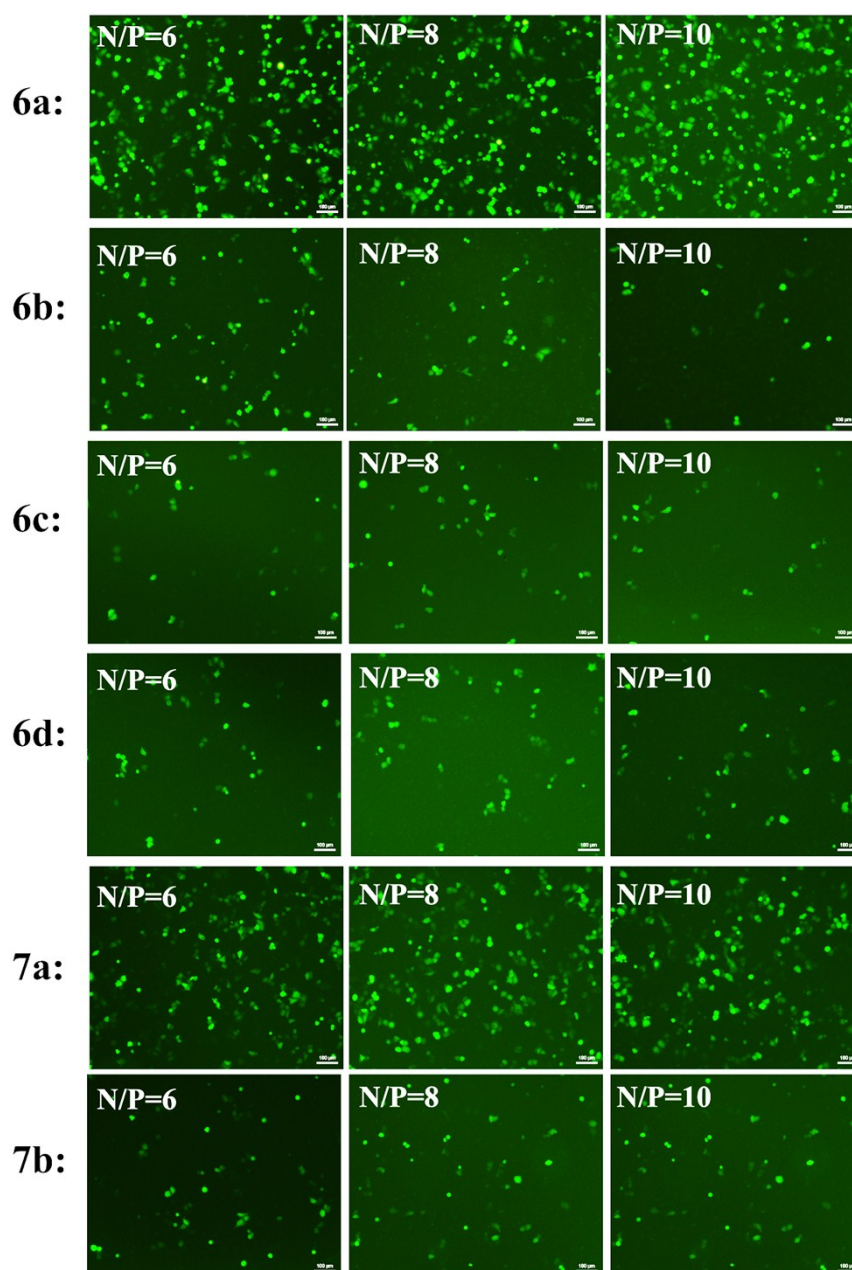

**Fig. S5.** Fluorescent microscope images of 7402 cells transfected by the lipoplexes formed from the six lipids. The cells were observed by fluorescence microscopy 24 h after transfection. The molar ratio of lipid/DOPE was 1 : 3.

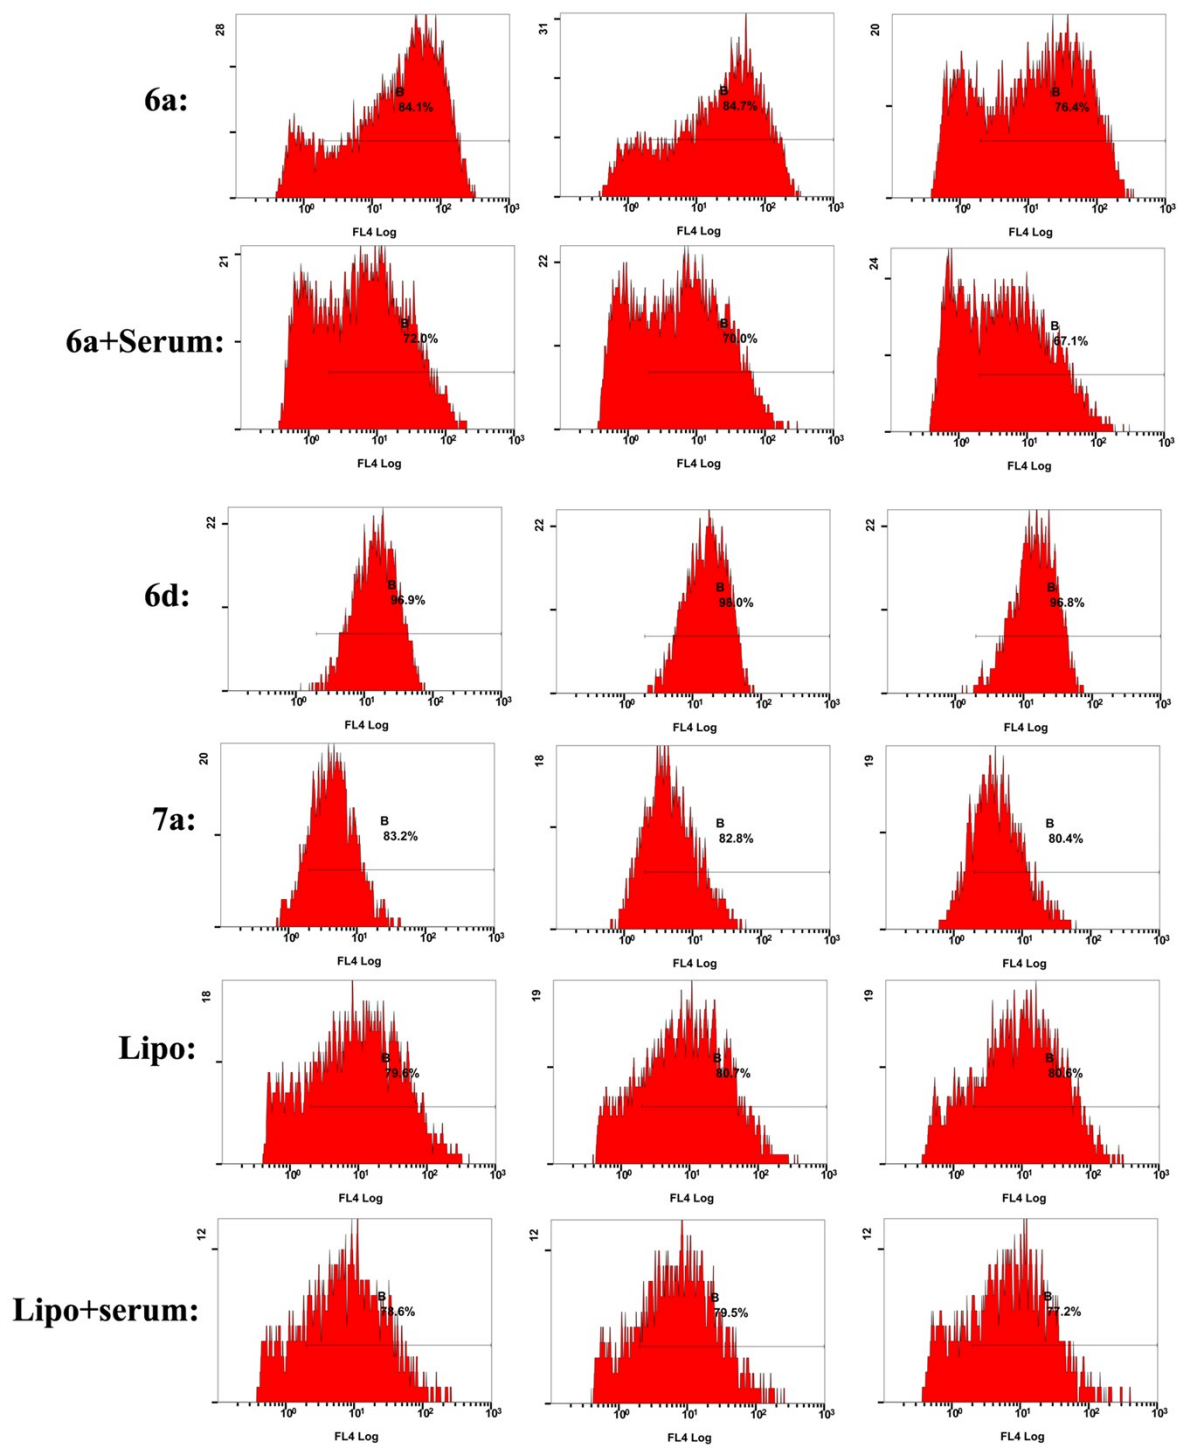

**Fig. S6.** Flow cytometry analysis of the liposomes at the optimal N/P ratio (N/P = 6 for **6a**, N/P = 8 for **6a** with serum, N/P = 8 for **6d** and N/P = 10 for **7a**). The molar ratio of lipid/DOPE was 1 : 3.
